# Supplementary material for: Discovery of a Novel Leaf Rust (Puccinia recondita) Resistance Gene in Rye (Secale cereale L.) Using Association Genomics
Source: MDPI journal article supplement (doi:10.3390/cells11010064), 2021-12-27
Supplement: s1 [file s1]

**Supplementary Table S1:** 1-9 scoring scale for leaf rust disease severity in rye (*Secale cereale* L.)

| Group                 | Score | Phenotype                                                        | Leaf Coverage (%) | Incidence (%) |
|-----------------------|-------|------------------------------------------------------------------|-------------------|---------------|
| Resistant             | 1     | No disease                                                       | 0-0.01            | 0             |
|                       | 2     | Few colonies/pustules/spots per plant                            | 0.1               | 1-49          |
| Partially Resistant   | 3     | Few colonies/pustules/spots per tiller                           | 0.5               | 51-100        |
|                       | 4     | Several colonies/pustules/spots on lower leaves: < 10 % coverage | 1                 | 100           |
| Partially Susceptible | 5     | Lower leaves: 10-25 % coverage                                   | 5                 | 100           |
|                       | 6     | Upper leaves: <10% coverage, lower leaves: 25-50 % coverage      | 10                | 100           |
| Susceptible           | 7     | Upper leaves: <25% coverage, lower leaves: 50-75 % coverage      | 25                | 100           |
|                       | 8     | Half of leaves dead with lower leaves: 75-95 % coverage          | 50                | 100           |
|                       | 9     | No green                                                         | 75-100            | 100           |
